# Supplementary material
Source: bioRxiv or medRxiv preprint supplement (https://www.biorxiv.org/highwire/filestream/120997/field_highwire_adjunct_files/0/399931-1.pdf)
Supplement: Supplementary file [file 399931-1.pdf]

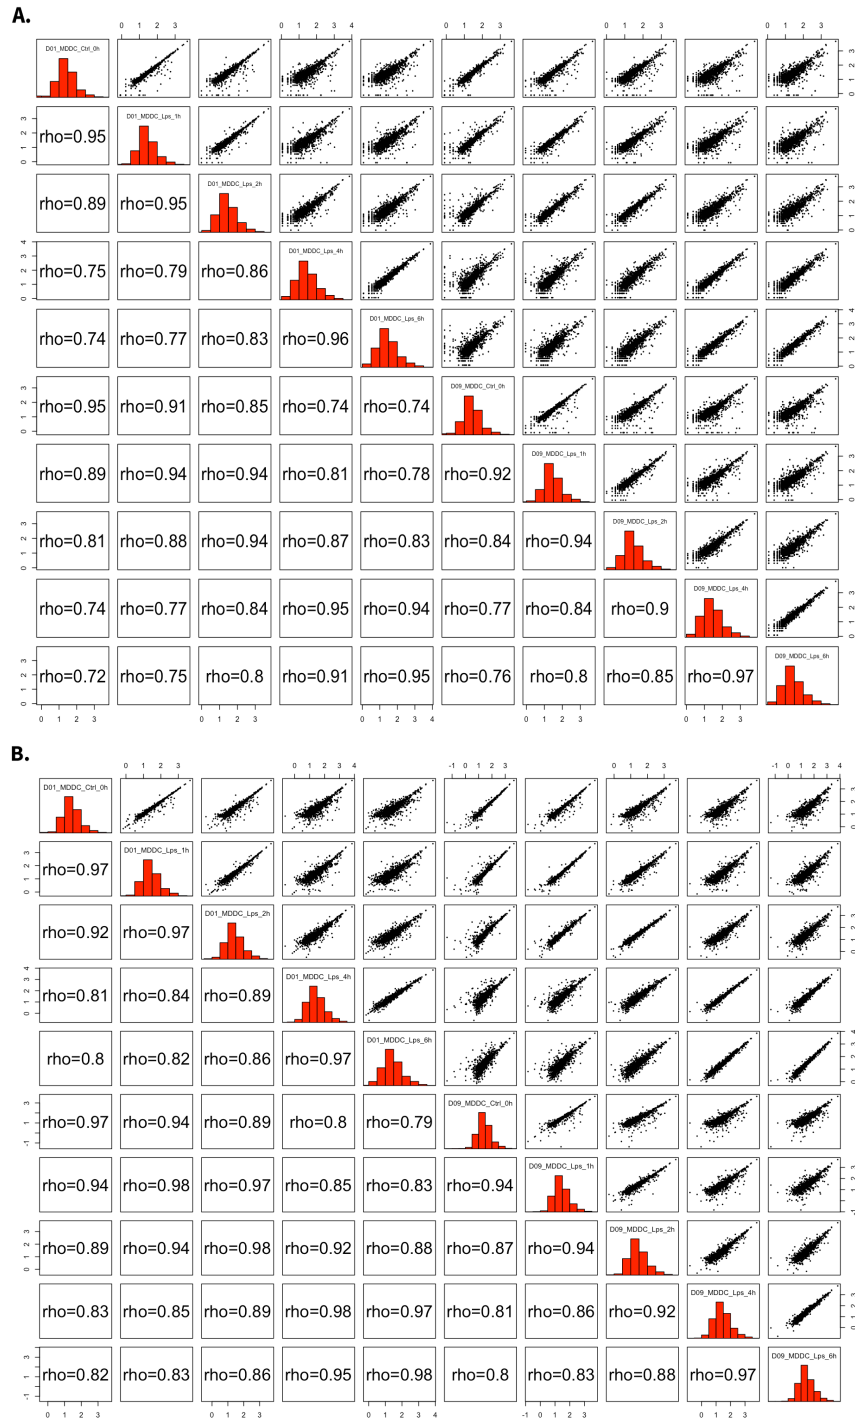

Figure S1. All2all scatter plot before (A) and after (B) batch correction.
